# Supplementary material
Source: PubMed Central journal article supplement (PMC6582941)
Supplement: NIHMS1032387-supplement-supplm_figures.pdf [file NIHMS1032387-supplement-supplm_figures.pdf]

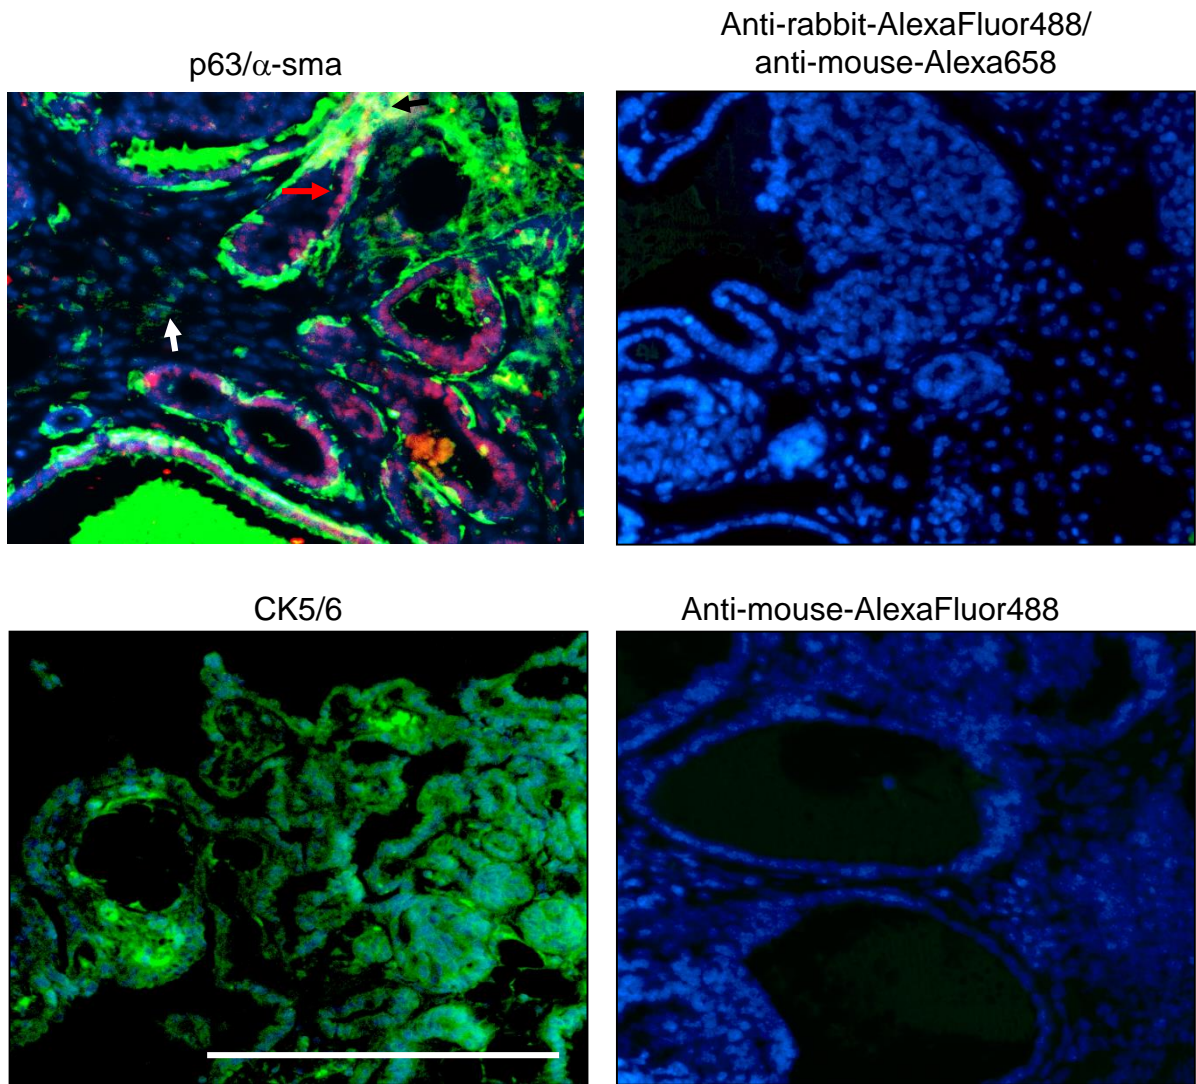

**Supplemental Fig 1. Expression of p63,  $\alpha$ -sma and CK5/6 in in papillary lesions derived from MMTV-PyVmT/C57Bl/6 mice.** Mammary lesions from 15 week old MMTV-PyVmT/C57Bl/6 mice were immunofluorescence stained for p63 (red),  $\alpha$ -sma (green), or CK5/6 (green), with DAPI counterstain. White arrow points to  $\alpha$ -sma+ fibroblasts. Red arrow points to p63+ epithelium. Black arrow points to p63+/ $\alpha$ -sma+ myoepithelium.

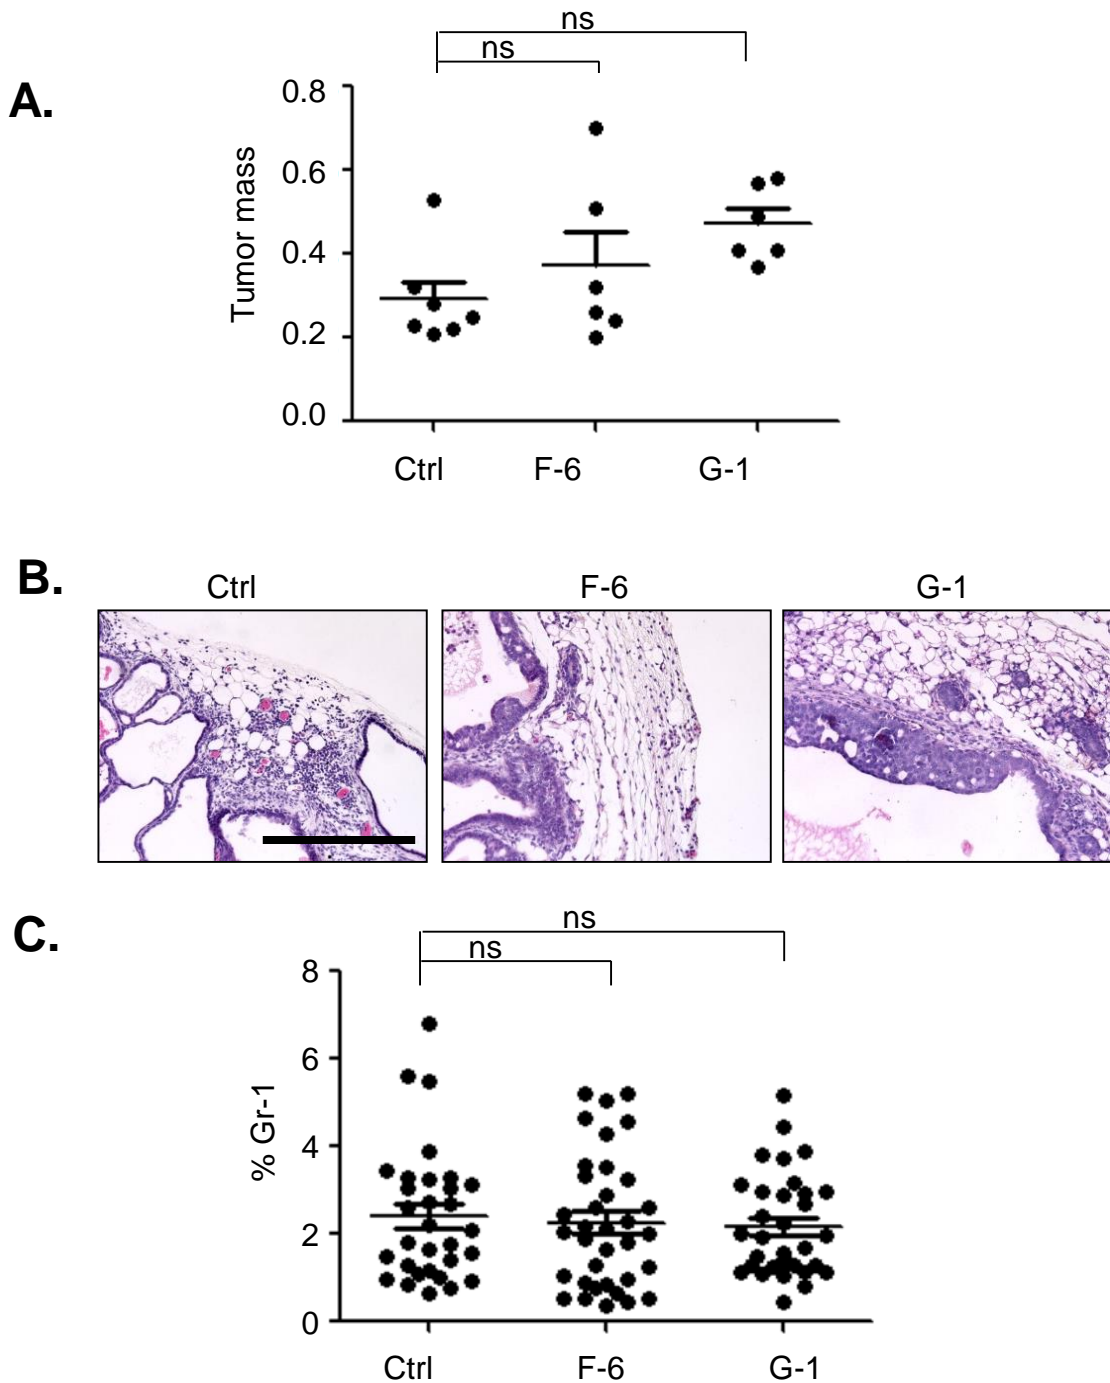

**Supplemental Fig 2. CXCR2 knockdown does not affect tumor growth of 144epi cells transplanted alone.** 144epi cells expressing control or CXCR2 shRNAs (F-6, G-1) were orthotopically transplanted into C57Bl/6 mice for 60 days. Mammary tissues were analyzed for **A.** tumor mass, **B.** H&E and **C.** Gr-1 expression by immunostaining. Immunostaining was quantified by Image J. Statistical analysis was determined by One Way ANOVA followed by Bonferonni post-hoc analysis. Statistical significance was determined by  $p < 0.05$ . \* $p < 0.05$ ; ns=not significant. Scale bar=200 microns. N=6 per group.

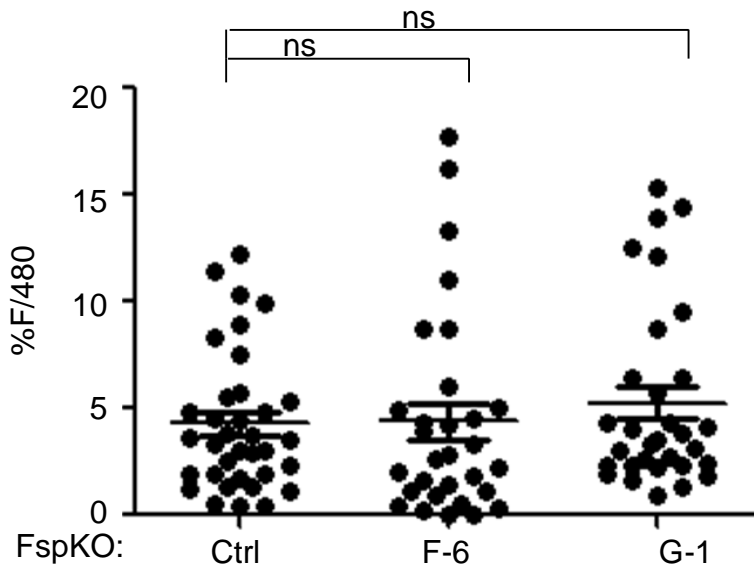

**Supplemental Fig 3. CXCR2 knockdown does not affect recruitment of F4/80+ cells mediated by *Tgfb2*<sup>FspKO</sup> fibroblasts.** Mammary lesions derived from *Tgfb2*<sup>FspKo</sup> fibroblasts transplanted with control shRNA (Ctrl) or CXCR2 deficient 144epi cells (F-6, G-1) were immunostained for F4/80. Expression levels were quantified by Image J. Statistical analysis was determined by One Way ANOVA followed by Bonferonni post-hoc analysis. Statistical significance was determined by  $p < 0.05$ . \* $p < 0.05$ ; ns=not significant.  $n=7$  for 144epi:Control shRNA,  $n=6$  for 144epi:F-6,  $n=6$  for 144epi:G-1.

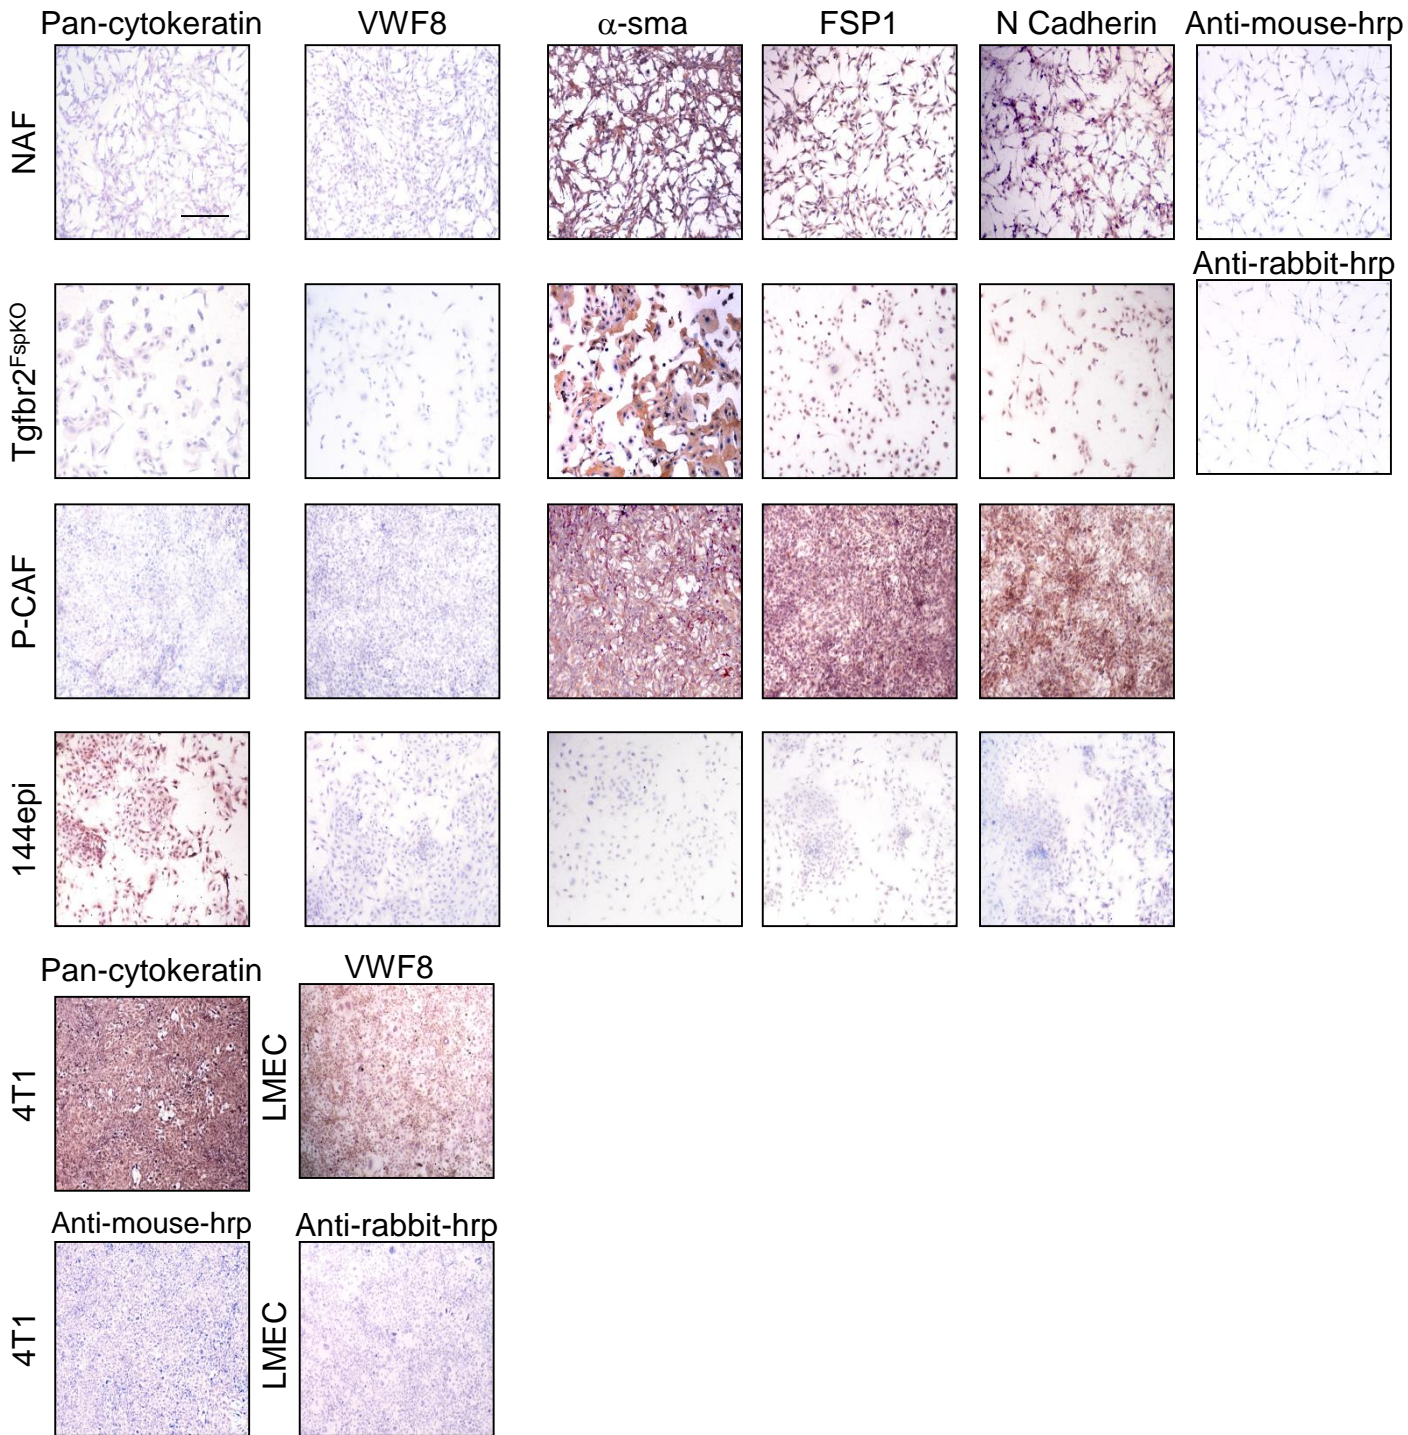

**Supplemental Fig 4. Molecular Characterization of fibroblasts and 144epi cells.**

Cultured NAFs, Tgfr2<sup>FspKO</sup> fibroblasts, P-CAFs and 144epi cells were immunostained for expression of the indicated proteins and counterstained with hematoxylin. 4T1 mammary carcinoma cells were used as a positive control for Pan-cytokeratin staining. Lung microvascular endothelial cells (LMEC) were used as a positive control for VWF8 staining. Scale bar=400 microns.

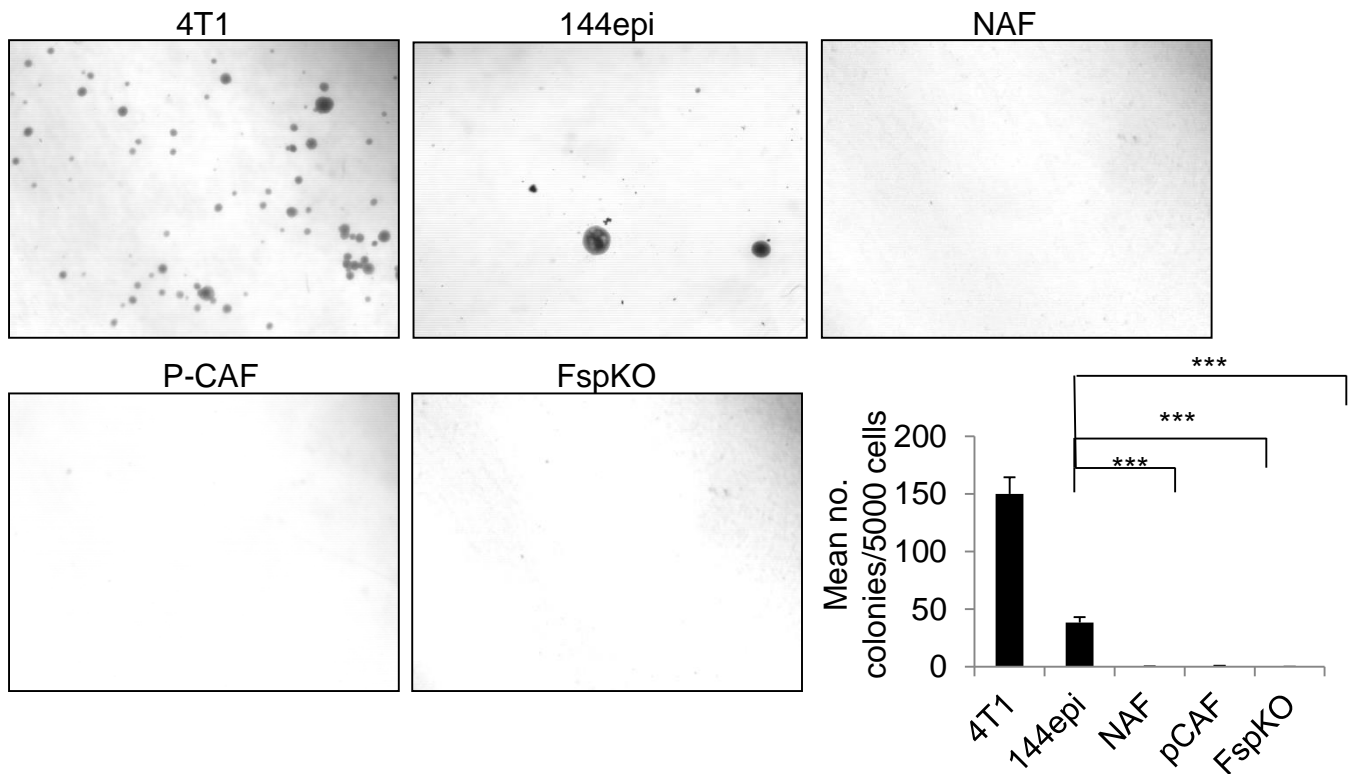

**Supplemental Fig 5. Growth of 144epi cells and fibroblasts in soft agar.** 4T1 mammary carcinoma cells (positive control), 144epi cells, NAFs, P-CAF or  $Tgfr2^{FspKO}$  fibroblasts were plated in soft agar in triplicate wells for 14 days s. Colonies were counted using Image J software. Statistical analysis was determined by One Way ANOVA followed by Bonferonni post-hoc analysis. Experiments were performed 3 times. Statistical significance was determined by  $p < 0.050$  \*\*\* $p < 0.001$ . Scale bar= 1 mm.

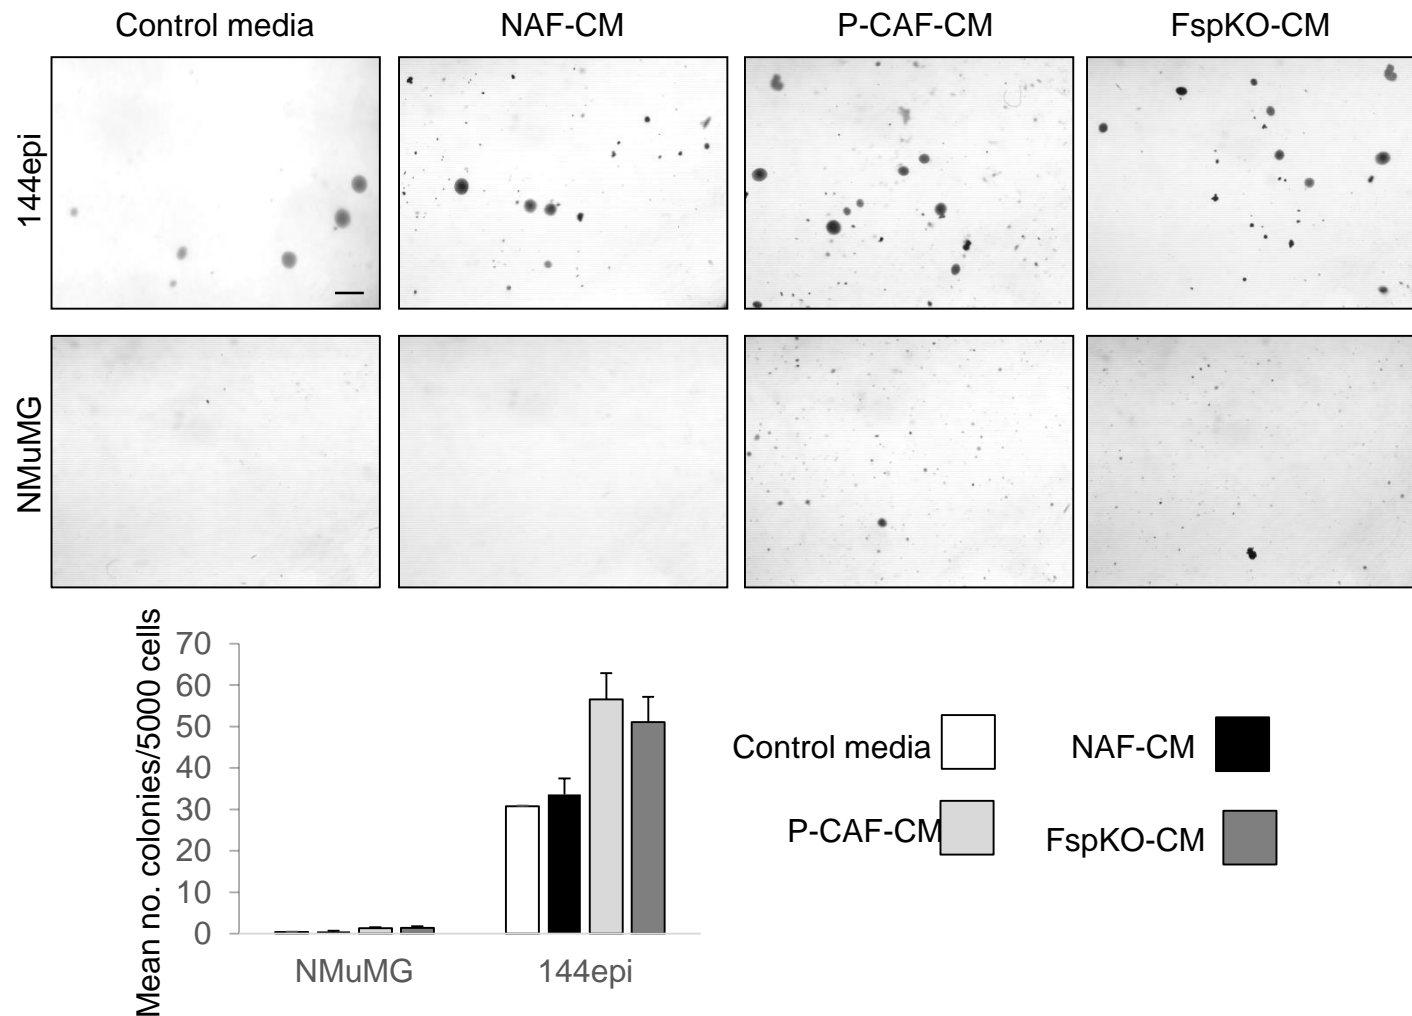

**Supplemental Figure 6. Effect of fibroblast conditioned medium on 144epi and NMuMG cell growth in soft agar.** NMuMG and 144epi mammary epithelial cells were plated in soft agar in triplicate wells in the presence or absence of control DMEM/10% FBS medium or conditioned medium from NAFs, P-CAF or Tgfbr2<sup>FspKO</sup> fibroblasts for 14 days. Colonies were counted using Image J software. Statistical analysis was determined by One Way ANOVA followed by Bonferonni post-hoc analysis. Experiments were performed 3 times. Statistical significance was determined by  $p < 0.050^{***}$   $p < 0.001$ . Scale bar= 1 mm.

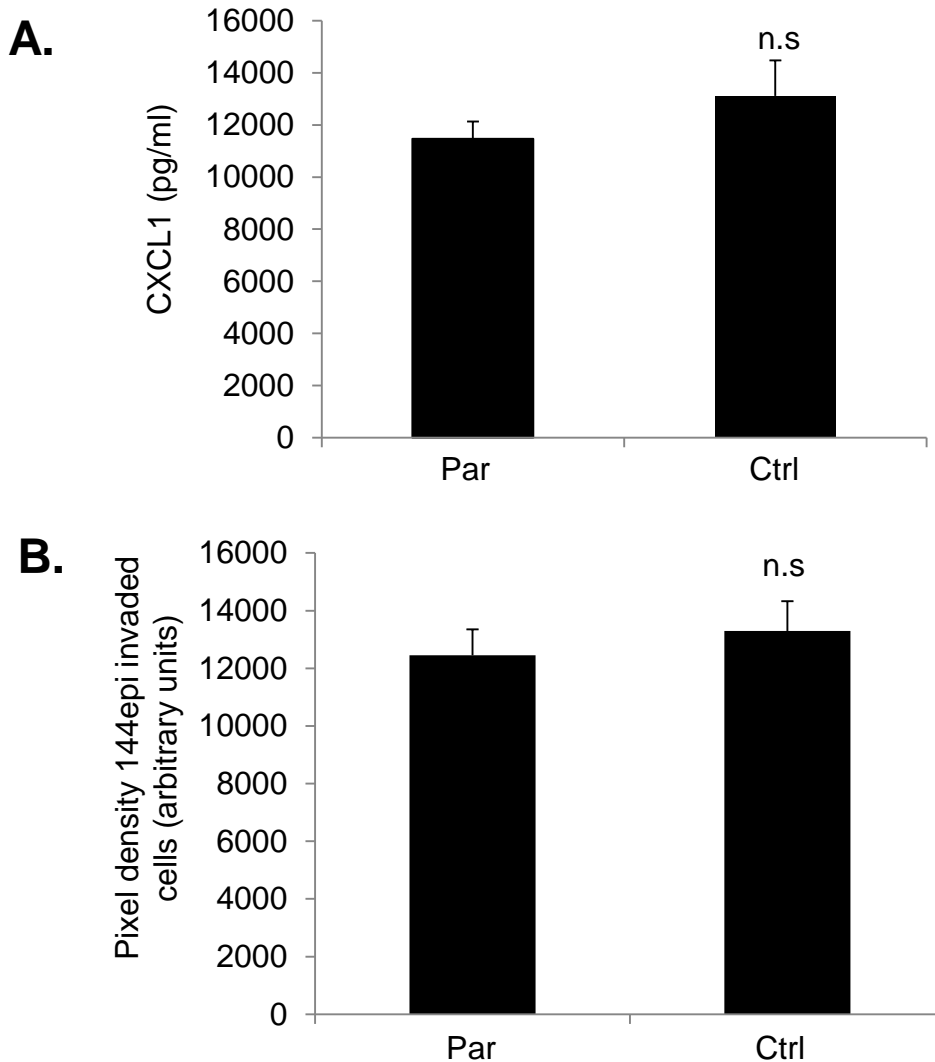

**Supplemental Fig 7. Effects of control siRNA transduction in P-CAF on CXCL1 expression and 144epi invasion. A.** P-CAFs were transfected with control siRNAs (Ctrl) and analyzed for CXCL1 expression by ELISA **B.** P-CAF were coated on the underside of Matrigel coated Transwells and analyzed for 144epi invasion to the underside. Statistical analysis was determined by Two Tailed T-test. Statistical significance was determined by  $p < 0.05$ . n.s= not significant. Mean $\pm$ SEM values are shown.
